# Supplementary material for: Dissolution of Arsenic Minerals Mediated by Dissimilatory Arsenate Reducing Bacteria: Estimation of the Physiological Potential for Arsenic Mobilization
Source: PubMed Central journal article supplement (PMC3958731; doi:10.1155/2014/841892), 2014-03-02
Supplement: 841892.f1.pdf [file 841892.f1.pdf]

## Supplementary data

**Table S1. Nucleotide sequences of cytoplasmic arsenate reductase (*arsC*) and respiratory arsenate reductase (*arrA*) genes**

| Strain                                                    | Nucleotide sequence 5'→3'                                                                                                                                                                                                                                                                                                                                                                                           |
|-----------------------------------------------------------|---------------------------------------------------------------------------------------------------------------------------------------------------------------------------------------------------------------------------------------------------------------------------------------------------------------------------------------------------------------------------------------------------------------------|
| <b>cytoplasmic arsenate reductase (<i>arsC</i>) genes</b> |                                                                                                                                                                                                                                                                                                                                                                                                                     |
| <i>Shewanella</i> sp. OM1                                 | GTGCTCTTTCTATGTACCATAATGCCTGTCGCGAGCATCCTAGCTGAAGCTATAGGTCGAGATCTCG<br>TCGGTAAGCAAGCTTTGACTACTATTGCTCAATGGCAATTTGCGAGTGCCGGTCTGTAACCTGCCG<br>GGGTCTGTTATCCTCAAACCTCTATTGCAACTAGCACACAGAGGCTATGTTACCGAAGGGCTCTCCAG<br>CAAAGCTGGGTTATGATGGCGGATTCTACTCTGACTTGTGATCACTGTTTGTGATAATGTGCG<br>GGAGAAACCTGTCCTTTGTGGTTAGGTCAAACACTTAAATTACATTGGGGTTTACCCGACCCAACAT<br>CAATCGACGCCCCGATATAGATGAGCAATTTAGCTATGTTATAGAAACACTT |
| <i>Pseudomonas</i> sp. OM2                                | AGATTAGTCTGTTTCATGTGCACGGCCAACAGCTGCCGAGCATCCTCTCTGAAGCCATGTTCAATC<br>ATCTGGCGCCAGCGGGATTGCAAGCGGTGAGTGCCGGCAGCTTCCCCAAAGGTCAGGTGTTGCCG<br>CGCAGCCTGTGACGCTGCAACAGGCCGGCATCGCCATTGATGGTTTGACAGCAAAGGCAACGAC<br>GCTTTTGAAAGCAACCCGCCGACATCGTCATCACCGTGTGCGACAAAGCCGCTGGCGAGACTTGC<br>CCGGTGTATTTGCGCCCGGCGCTGAAATCCCCTGGGGCTGGAAGATCCCTCCGAAGTGAAGGG<br>CGACGAAGCCACTGTGACGCGGCATTCCACGCCAAATCAC                     |
| <i>Aeromonas</i> sp. OM4                                  | ATGCACAGGCAACTCTTGCCGTTCCATTCTGGCAGAGGCGACCTTTAACCACTGGCTCCAGCCGGT<br>TGCCATGCCATGAGTGCCGGTAGTCAGCCAACCGGTGAGGTGCATCCCCGTTCACTGGCGTTATTG<br>ACCCGCGAAGGTATCGATATCAGCGGATTGCACAGCAAATCCTGGCATGAGCTGCCGGTGACGCCC<br>GATGTTGTGATCAGCGTGTGTGTAACGCGGCAATGAAACCTGTCCTGTCTATTTGGGGCTGTAT<br>TGCGAGCCCACTGGGGCGTAGATGATCCCGCCATGTGACCGGCAGCGAGGAGCAGATAGCGCTC<br>GCCTTTCACTGTGCATACTCGACGCTGAGAAAGCGTATCGAAGCCCTCTTGTGCGAG |
| <i>Serratia</i> sp. OM17                                  | ACGTACCAGCCGGCTTGCGGCACATCGCGCAATACGTTGGCACTGATCCGCAACAGTGGTGTGGAA<br>CCGACGGTGATTTTGTATCTGGAGACACCGCCGACCGTACGCAATTGCTCAAGCTGATTGCCGATA<br>TGGGGATATCTGCGCGAGCCTTATTGCGTAAAAACGTGGAGCCTTATGAATCGTTGGGGCTGGCGG<br>AGGTAGGCTGGAGTGACGAACAGTTGATCGACTTTATGTTGCAACAGCCGATATTGATTAATCGAC<br>CTATTGTTGGTACACCCCTGGGCACCCGTCTGTGTCGACCGTCGGAAGCCGTGCTGGATATCCTGCC<br>GGATCCGACGAAGGTCTTTCACTAAGGAAGACGGTGAAAAAGTA         |
| <b>respiratory arsenate reductase (<i>arrA</i>) genes</b> |                                                                                                                                                                                                                                                                                                                                                                                                                     |
| <i>Shewanella</i> sp. OM1                                 | GCCCTTAAGGTGTATGGAATAAAGCGTTTGTGGAGATTTTATTGAGGGTAAAAACCTGTTAAAGC<br>GGGTAAAACCGTCCGTATCGAGAGCTTTAAAGAAAGCCATACCTACGGTTTATTGAGGTGGTGGAA<br>CCAAGCTCTAAAGACTATACCCGAAAGTGGGCACCTGAAATCACAGGAAGGGC                                                                                                                                                                                                                    |
| <i>Pseudomonas</i> sp. OM2                                | GCCCTTAAGGTGTATGGAATAAAGCGTTTGTGGGAGACTTCACTGACCCTGACCAGCGCTTTGTCAC<br>CGGGCAGCCGGTGAGCGCAGAGCTTTCGCCGAGCGTCATACCCATGCTCTGGTGAATGGTGGAA<br>ATCTAGAAGTAAAGATCGGACACCCAAATGGGCACCTGAAATCACAGGAAGGGC                                                                                                                                                                                                                   |
| <i>Aeromonas</i> sp. OM4                                  | GATAAGGTGTATGGAATAAAGCGTTTGTGGGAGACTTCACTGACCCTGAGCAGCGCTTTGTCACCG<br>GGCAGCCGGTGAGCGCAGAGCTTTCGCCGAGCGTCATACCCATGGTCTGGTGAATGGTGGAAAT<br>CTGGAAGTAAAGATCGGACACCGGAAATGGGCACCTGAAATCACAGGAATCACTAGT                                                                                                                                                                                                                 |
| <i>Serratia</i> sp. OM17                                  | AAGGTGTATGGAATAAAGCGTTTGTGGGCGACTTACCCGACCCTGAGCAGCGCTTTGTGGACCGGC<br>CAGCCGGTGAGCGCAGAGCTTTCACCGAGCGTCATACCCATGGTCTGGTGAATGGTGGAAATCTG<br>GAACTGAAAGATCGGACCCCAATGGG CACCTGAAAT CACAGG                                                                                                                                                                                                                             |



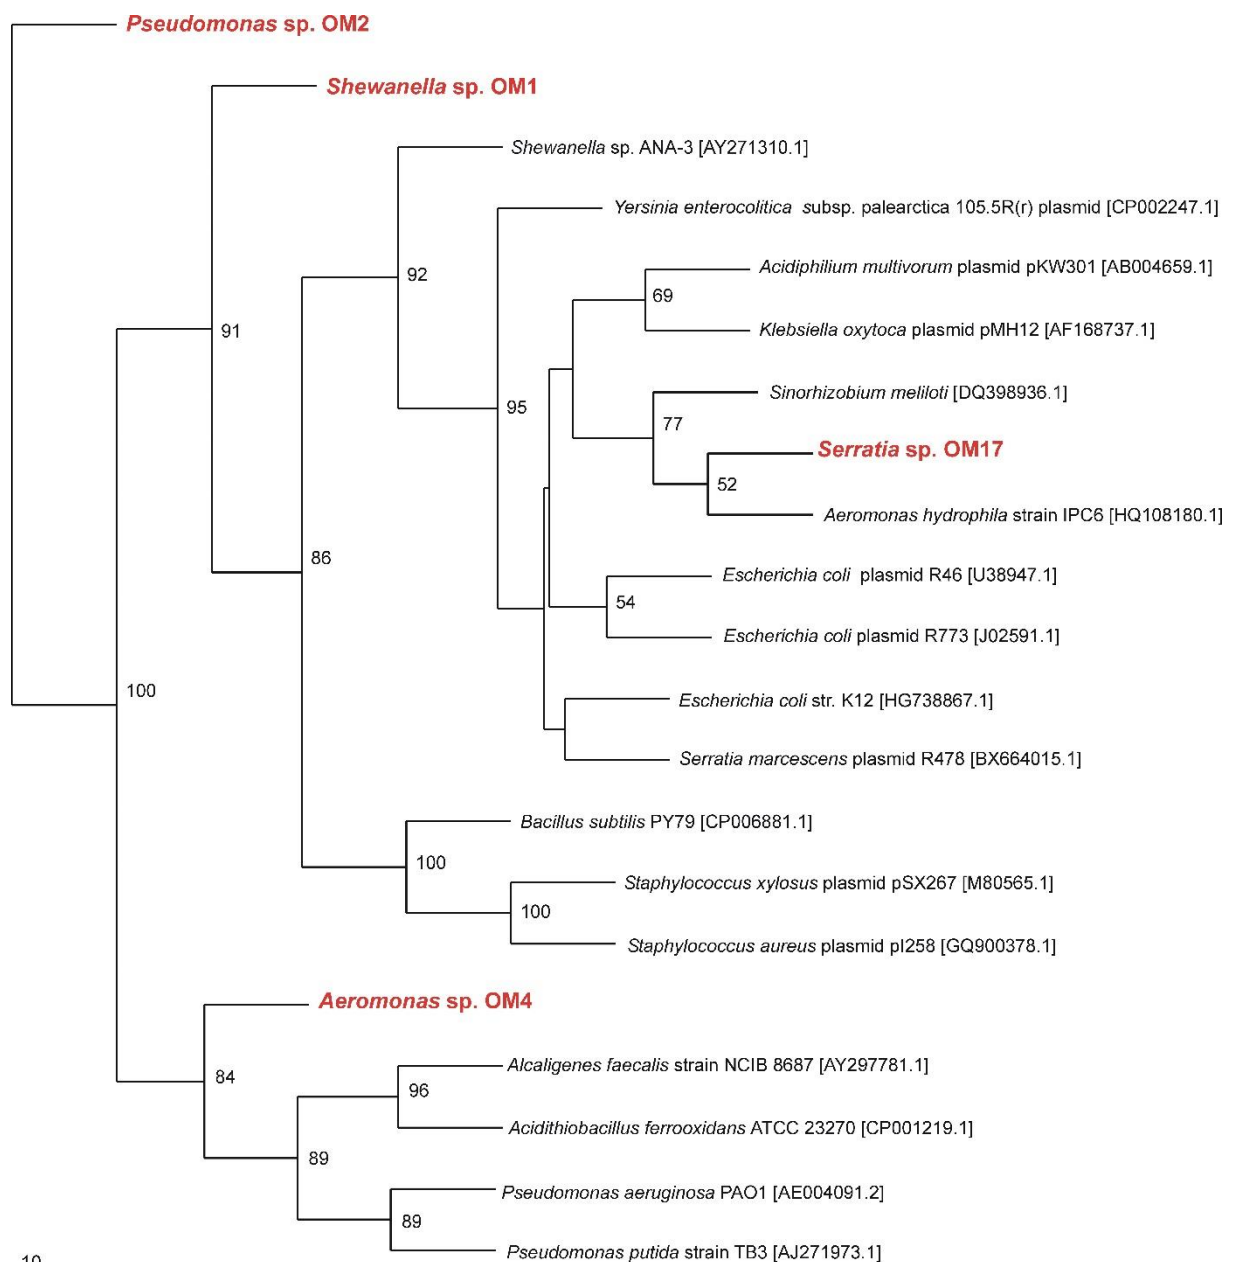

10

**Figure S1. Phylogenetic tree of the cytoplasmic arsenate reductase gene (*arsC*)** based on 21 sequences. The unrooted tree was constructed using the Maximum Parsimony algorithm according to Kimura model. The statistical support for the internal nodes was determined by 100 bootstrap replicates. Values of >50% are shown. Accession numbers of the nucleotide sequences used for the phylogenetic analysis are given in parentheses. Sequences derived from arsenate respiratory isolates (OM1, OM2, OM4, OM17) are indicated in large bold red type, sequences derived from others strains are indicated in black type.

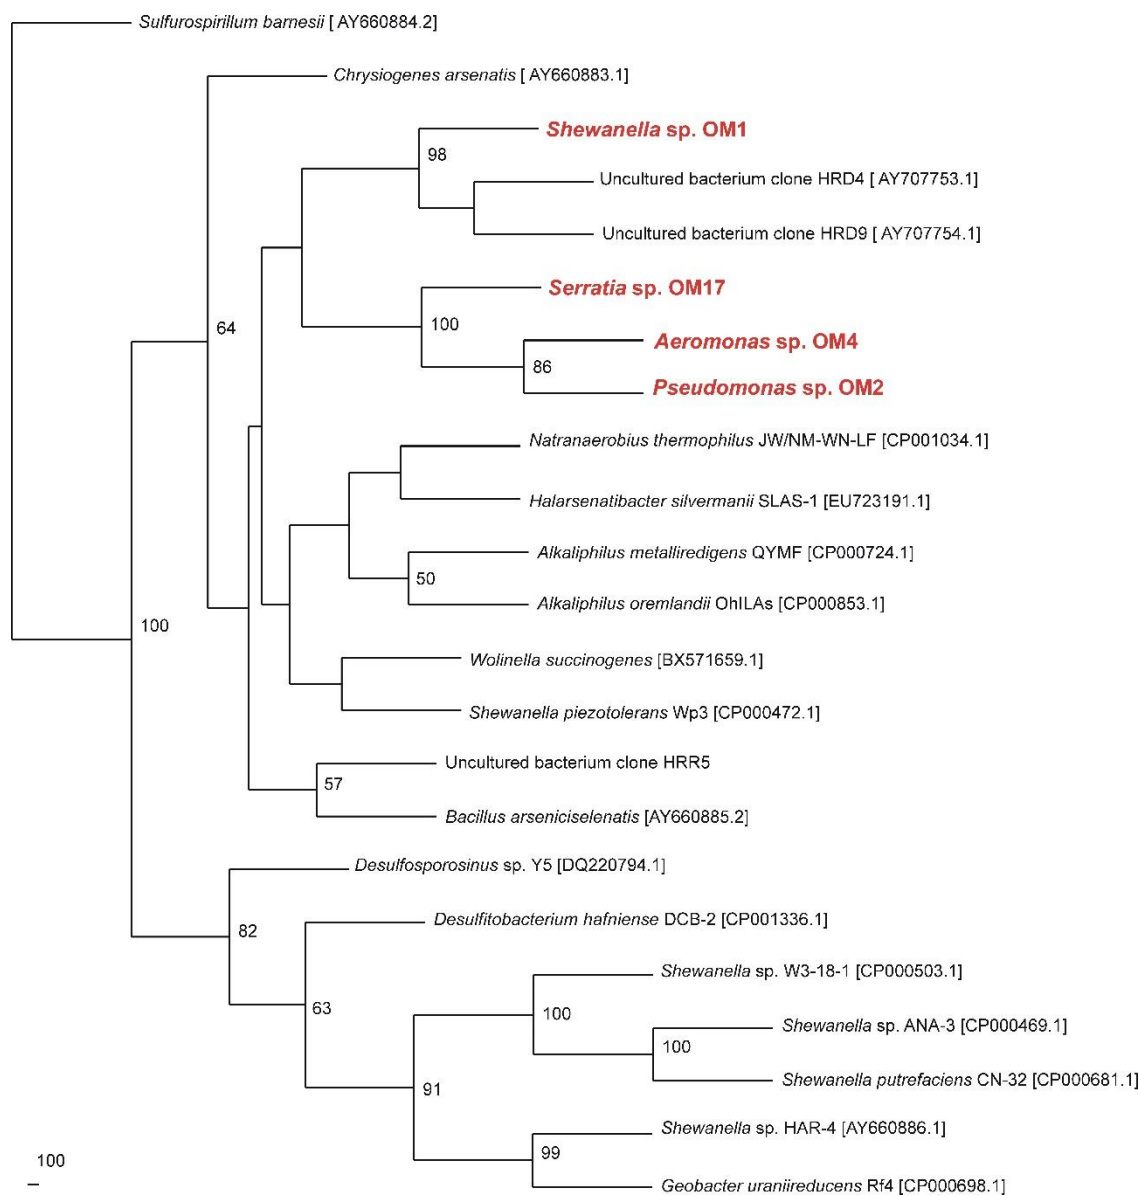

**Figure S2. Phylogenetic tree of the respiratory arsenate reductase gene (*arrA*)** based on 23 sequences. The unrooted tree was constructed using the Maximum Parsimony algorithm according to Kimura model. The statistical support for the internal nodes was determined by 100 bootstrap replicates. Values of >50% are shown. Accession numbers of the nucleotide sequences used for the phylogenetic analysis are given in parentheses. Sequences derived from arsenate respiratory isolates (OM1, OM2, OM4, OM17) are indicated in large bold red type, sequences derived from others strains are indicated in black type.
